# Supplementary material for: Highly selective fluorescence off–on probes for biothiols and imaging in live cells
Source: Royal Society of Chemistry journal article supplement (doi:10.1039/c4ob01031k), 2014-07-08
Supplement: c4ob01031k1.pdf [file c4ob01031k1.pdf]

## Highly Selective Fluorescence off-on Probes for Biothiols and Imaging in Live Cells

Di Zhang,<sup>a,b</sup> Wei Chen,<sup>b</sup> Jianming Kang,<sup>b</sup> Yong Ye,<sup>a,\*</sup> Yufen Zhao,<sup>a</sup> and Ming Xian<sup>b,\*</sup>

<sup>a</sup>College of Chemistry and Molecular Engineering, Zhengzhou University, Zhengzhou 450052, China.

<sup>b</sup>Department of Chemistry, Washington State University, Pullman, WA 99164, USA.

### Model reaction between RSHP1 and compound 3

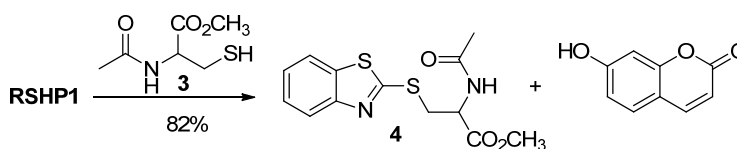

To the solution of **RSHP1** (55 mg, 0.15 mmol) in THF (2 mL) and PBS buffer (2 mL, 50 mM, pH = 7.4) was added compound **3** (80 mg, 0.45 mmol). The mixture was stirred for 30 min at 37 °C. No starting material was observed on TLC. Then DCM (50 mL) was added into the solution to extract the reaction mixture. The organic layer was separated, dried by MgSO<sub>4</sub>, and concentrated. Compound **4** and 7-OH-coumarin were isolated in 82 % yields by column chromatography. The structure of compound **4** was confirmed by NMR.<sup>1</sup>

### Preparation of the solutions and fluorescence measurements

The stock solutions of **RSHP1**, **RSHP2**, **RSHP3** (2 mM) were prepared in DMSO. The solutions of various testing species were prepared from cysteine (Cys), GSH, homocysteine (Hcy), glutathione disulfide (GSSG), Na<sub>2</sub>S<sub>2</sub>O<sub>3</sub>, Na<sub>2</sub>SO<sub>3</sub>, H<sub>2</sub>O<sub>2</sub>, NaClO, NaNO<sub>2</sub> in 50 mM PBS buffer (pH 7.4), and KO<sub>2</sub> solution was prepared in DMSO. All the test solutions needed to be freshly prepared.

Unless otherwise noted, all the measurements were carried out for 15 min at 37 °C in 50 mM PBS buffer (pH 7.4) with 10% DMSO according to the following procedure. For **RSHP3**, in a test tube, 3.5 mL of 50 mM PBS buffer (pH 7.4) was added, and then added a requisite volume of testing species sample solution. The resulting solution was mixed well, followed by addition of 20 μL of the stock solution of **RSHP3**. The final volume of the reaction

solution was adjusted to 4 mL with 50 mM PBS buffer (pH 7.4) with 10% DMSO. After mixing and then standing for 15 min at 37 °C, a 4-mL portion of the reaction solution was transferred into a 1-cm quartz cell to measure fluorescence with  $\lambda_{\text{ex}} = 490$  nm. PMT detector voltage = 450 V. In the meantime, a blank solution containing no testing species was prepared and measured under the same conditions for comparison. Error bars represent the standard deviation from triplicate experiments.

- 
1. D. Zhang, N. O. Devarie-Baez, Q. Li, J. R. Lancaster, Jr., M. Xian, *Org. Lett.*, 2012, **14**, 3396.

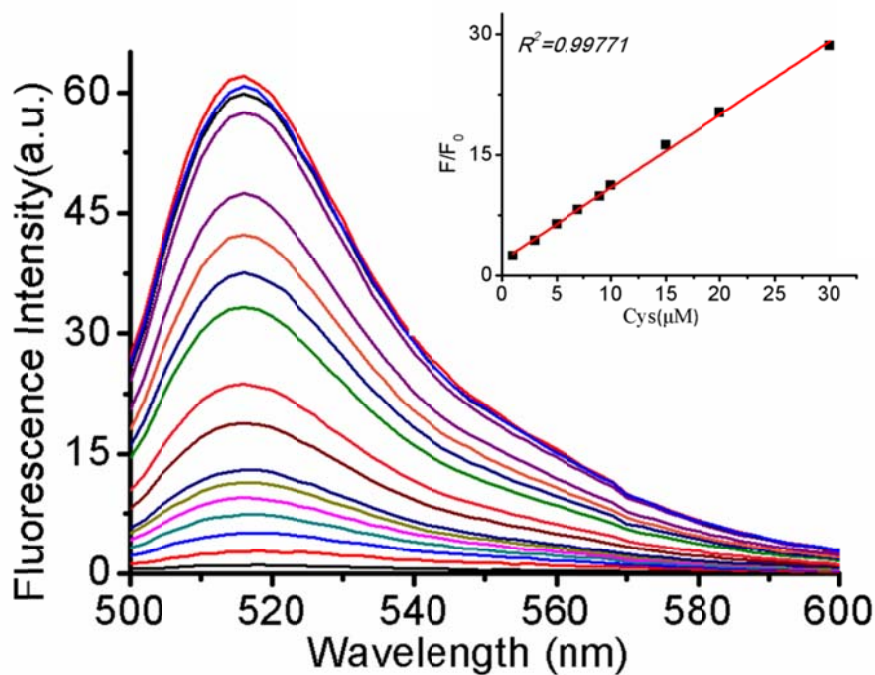

**Figure S1.** Fluorescence emission spectra of **RSHP3** (10 μM) with varied concentrations of Cys (0, 1, 3, 5, 7, 9, 10, 15, 20, 30, 40, 50, 60, 70, 80, 90, 100 μM for curves 1-17, respectively). The reactions were carried out for 15 min at 37 °C in PBS buffer (50 mM, pH = 7.4) with 10% DMSO. Inset: linear plot of **RSHP3** (10 μM) upon the addition of different amounts (0, 1, 3, 5, 7, 9, 10, 15, 20, 30 μM) of Cys in PBS buffer (50 mM, pH = 7.4) with 10% DMSO. ( $\lambda_{\text{ex/em}} = 490/518$  nm).

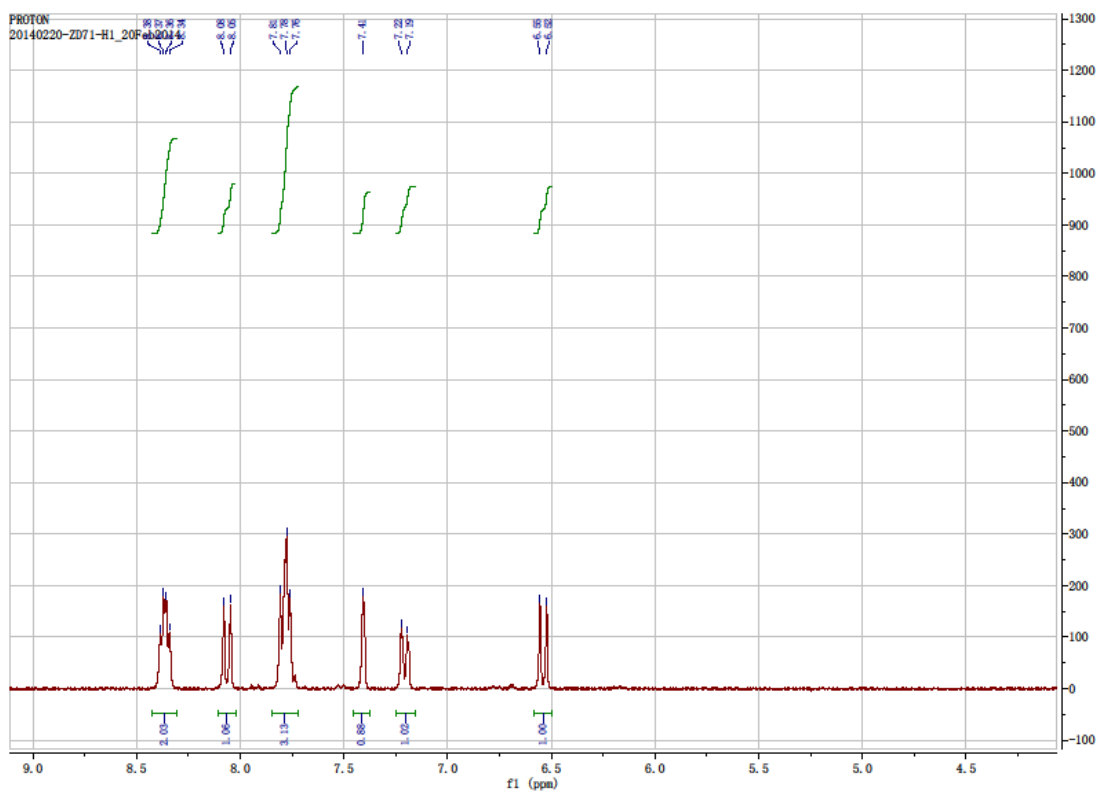

**Figure S2.**  $^1\text{H}$  NMR (300 MHz, DMSO) of **RSHP1**

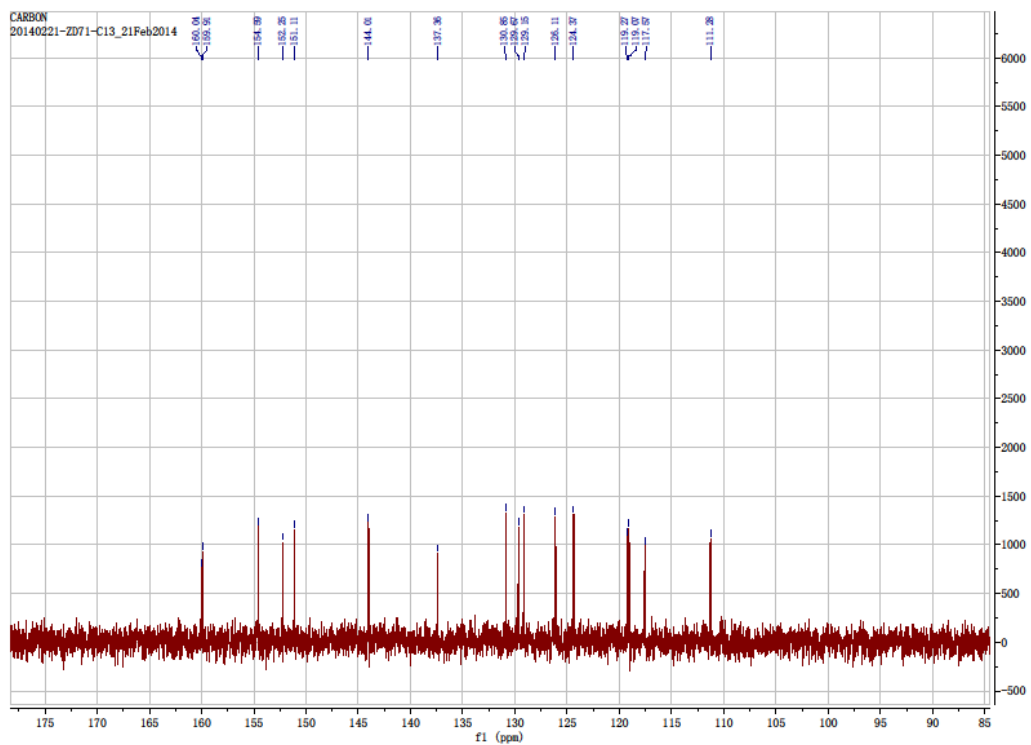

**Figure S3.**  $^{13}\text{C}$  NMR (75 MHz, DMSO) of **RSHP1**
